# Supplementary material for: Identification of two QTLs, BPH41 and BPH42, and their respective gene candidates for brown planthopper resistance in rice by a combinatorial approach of QTL mapping and RNA-seq
Source: Research Square preprint supplement (doi:10.21203/rs.3.rs-979035/v1), 2021-11-08
Supplement: Supplementary file 1 [file 7e28e07fce8db631e1538385.docx]

**Table S2. SNP and flanking sequences used in this study**

| **Marker ID** | **SNP Sequence** |
| --- | --- |
| SWRm_01617 | TGTATTCCAAGGTAAACCCAGCAACTCTTTGCAAAGGAGCAGGAGAAAAA[A/G]AGATGGGTCGTGTCTTCAARGGCTGCATCACTGCACATTACACATTCTGG |
| SWRm_01522 | TGTTGAGGACTTGATACTGGATTGGCATGTTCTGTTGTAACGACCACAAC[T/C]AATATGTATATTATATTTAGTTCACCAACTATACATATATGTTGGAGTCT |
| SWRm_01695 | TCTATCATTGGGTTATCATTAGGCTAGAGGGCCGCTCCACCAACTCTATC[C/T]AACTGCATGGTCACTCCTATCACGTCATTCTTGCTATAGTGCGATAATAT |
| SWRm_00328 | TCGCCGCCGCCGCTTCGCTCTCATCTCTCCCCGTCTCCGTCTCCACCACCATGGATTGAT[A/G]CCTCAGAAAGTCTTCGGTCTTCGTCGGAGTCACCAATCACATGGCGATTGCGAGCACGCA |
